# Supplementary material
Source: publisher figshare collection journal article supplement (https://asha.figshare.com/articles/dataset/_/5572786)
Supplement: Supplementary file 1 [file 1]

**Supplemental Material S2.** The five traits comprising the holistic scoring rubric and descriptors for each illustrating the lowest and highest possible point values, as well as scoring examples from summaries produced by 18-year-old female participants in both groups. Summaries from each participant are shared in Figures 1 and 2.

| Trait                                                | Score 0 ( <i>None</i> )                                                                              | Score 4 ( <i>Best</i> )                                                                                                                                                                                                                                                       | Compare–contrast<br>quality scores |     | Cause–effect<br>quality scores |     |
|------------------------------------------------------|------------------------------------------------------------------------------------------------------|-------------------------------------------------------------------------------------------------------------------------------------------------------------------------------------------------------------------------------------------------------------------------------|------------------------------------|-----|--------------------------------|-----|
|                                                      |                                                                                                      |                                                                                                                                                                                                                                                                               | TD                                 | TBI | TD                             | TBI |
| A. Gist, topic/key sentence, main idea               | Statements do not link to a central topic.                                                           | Introductory sentence (topic/key) provides an accurate overview of how the passage is organized (e.g., <i>Lifeland was very advanced, and its developments in inventions, ship building, written language &amp; architecture helped to change other parts of the world</i> ). | 2                                  | 1   | 3                              | 0   |
| B. Text structure                                    | Ideas are randomly presented and <b>do not</b> link to each other.                                   | Passage is organized using more complex language to represent relationships within & between ideas/main points.                                                                                                                                                               | 2                                  | 1   | 3                              | 0   |
| C. Content (quantity, accuracy, & relevance)         | Statements are <b>not</b> related to the passage or do not communicate information from the passage. | <b>All</b> relevant/key ideas from the passage are clearly and accurately represented and appropriately elaborated.                                                                                                                                                           | 2                                  | 0   | 3                              | 0   |
| D. Conjunctions and signal words to indicate subtype | Uses <b>no</b> conjunctions or signal words.                                                         | Uses a <b>variety</b> (>1) of <b>more advanced</b> signal words, different from those stated in the passage (e.g., <i>similarly, whereas, however</i> ).                                                                                                                      | 3                                  | 2   | 4                              | 1   |
| E. Sentence structure                                | <b>No</b> complete sentences are included; includes only random phrases.                             | Uses <b>complete, complex</b> sentences with dependent clauses that appropriately express relationships.                                                                                                                                                                      | 2                                  | 3   | 4                              | 3   |

*Note.* TD = typical development; TBI = traumatic brain injury.
