# Supplementary material
Source: publisher figshare collection journal article supplement (https://asha.figshare.com/articles/dataset/_/5572786)
Supplement: Supplementary file 2 [file 1]

**Supplemental Material S1.** Comparison of cause–effect and compare–contrast expository discourse samples commonly used measures of length and reading level and Coh-Metrix.

| Measures of length and reading level | Cause–effect     | Compare–contrast |
|--------------------------------------|------------------|------------------|
| Number of words                      | 731              | 743              |
| Number of sentences                  | 50               | 51               |
| Words per sentence                   | 14.6             | 14.5             |
| Paragraphs                           | 8                | 8                |
| Flesch Reading Ease                  | 66.0             | 61.7             |
| Coh-Metrix <sup>a</sup>              |                  |                  |
| Narrativity                          | 34%              | 25%              |
| Syntactic simplicity                 | 64%              | 72%              |
| Word concreteness                    | 65%              | 71%              |
| Referential cohesion                 | 45%              | 24%              |
| Deep cohesion                        | 60%              | 53%              |
| Grade level                          | 7.7 (range: 7–8) | 8 (range: 7–9)   |

<sup>a</sup>Explanations for Coh-Metrix variables (see McNamara, Graesser, McCarthy, & Cai, 2014): Narrativity = whether a text tells a story with characters, events, places and things familiar to readers; Syntactic simplicity = the use of simple sentence structures that are easy to understand; Word concreteness = the use of words that can be easily imagined; Referential cohesion = the presence of overlapping ideas and concepts in a text; Deep cohesion = the presence of explicit causal relationships; Grade level = based on Flesch Kincaid rating.

**Reference**

McNamara, D. S., Graesser, A. C., McCarthy, P. M., & Cai, Z. (2014). *Automated evaluation of text and discourse with Coh-Metrix*. New York, NY: Cambridge University Press.
