# Supplementary material
Source: publisher figshare collection journal article supplement (https://asha.figshare.com/articles/dataset/_/5572786)
Supplement: Supplementary file 3 [file 1]

**Supplemental Material S3.** Expository summaries from the additional four participants with traumatic brain injury (TBI).

**Compare–Contrast Summaries:**

**Participant 1 (13-year-old female):** Houses and apartments and buildings were built in Lifeland's city. No more than six apartments are allowed on a street. A household of four people will probably start starving and dying of thirst and start running out of room. It talked about how 35% of Americans have houses. How Lifeland's city doesn't like crowds because they might run out of water and food. And they're going to build factories and movie theatres. And I forget. I think that's it.

**Participant 2 (16-year-old male):** There's too many people. So they might have not enough jobs. So, that's not good.

**Participant 4 (14-year-old male):** In Lifeland, there are too many people trying to move in because it's such a great country. And so they set laws to only have six apartments on each street. And about each month, you pay about 36% tax. And they think too many people want to move in. And they just keep doing stuff to help them make more money. That's pretty much it.

**Participant 5 (17-year-old female):** So, she was talking about this small city called Lifeland. And how there's really not many people there. It's talking about how if more people move to Lifeland it will probably just get more crowded and less space. And it's just talking about how little that town is. And how many people is not even there. And if it gets crowded, the more problems is going to happen. It talked about this one event. I don't know what she's talking about.

**Cause–Effect Summaries:**

**Participant 1 (13-year-old female):** The Lifeland people were the first inventors of words and speech. And they built a bunch of structures. Like, they built pyramids and stuff. And some of the symbols used back then are still used. When they pass, some like to be buried in one of the structure that they have built. They were then inventors of language. They used gold and iron to make some of their inventions they have made. People would love to go and see their inventions that they have made in Lifeland.

**Participant 2 (16-year-old male):** Many people still come to Lifeland for the experience and the industry.

**Participant 4 (14-year-old male):** There was this country called Lifeland full of its people, Lifelands. And they created almost everything good because of the skills that the people in the country had. And other people wanted to build stuff like that. They built stuff like ships that would take the boats and jewels and other expensive stuff. And they built pyramids. And some of the pyramids took hundreds of years to build. And all together the Lifeland is basically the best country in the world. I don't even know if they're still real but I'm guessing that they were the greatest country in the world.

**Participant 5 (17-year-old female):** Well, she was talking about some Lifeland pyramids. And how people will stay in that area. People traveled to come see this Lifeland pyramid. That's all I know. That's all I know.
